# Supplementary material
Source: Research Square preprint supplement (doi:10.21203/rs.3.rs-9526893/v1)
Supplement: Supplementary file 1 [file 26b2030d3576f05c627ae077.docx]

**Supplementary Table S2. Antibodies used for western blot**

| Antibodies | Manufacturer | Catalog number | Dilution |
| --- | --- | --- | --- |
| CD133 | Abcom | ab278053 | 1:1000 |
| Nestin | Abcom | ab105389 | 1:1000 |
| SOX2 | CST | #23064 | 1:1000 |
| CD15 | Thermo Fisher | 41-1200 | 1:1000 |
| Tie1 | CST | #23111 | 1:1000 |
| P-PI3K | CST | #17366 | 1:1000 |
| PI3K | CST | #4292 | 1:1000 |
| P-AKT | CST | #4060 | 1:1000 |
| AKT | CST | #4691 | 1:1000 |
| P-GSK3β | CST | #5558 | 1:1000 |
| GSK3β | CST | #12456 | 1:1000 |
| p-β-Catenin | CST | #9561 | 1:1000 |
| β-Catenin | CST | #8480 | 1:1000 |
| GAPDH | Proteintech | 10494-1-AP | 1:2000 |
| β-Tubulin | AGMA | M20005L | 1:10000 |
