# Supplementary material
Source: Research Square preprint supplement (doi:10.21203/rs.3.rs-9526893/v1)
Supplement: Supplementary file 2 [file 859257da12518fac0eb0540a.docx]

**Supplymentary information**

Supplementary Figure1–8 and Supplementary Table S1-S2

**Supplementary Figure 1. PGCCs showed an enhanced capacity to form tumorspheres compared with their parental glioma counterparts.** (A) Representative light micrographs of tumorsphere formation of U87, U251 and their derived PGCCs at 7th day after cell placement. (B, C) Quantitative analysis of relative sphere numbers and relative sphere diameters of the indicated groups. Data represent the mean ± SD, * P < 0.05, *** P < 0.001, **** P < 0.0001.

**Supplementary Figure 2. PGCCs showed increased migrative and invasive capacities compared with their parental glioma counterparts.** (A) Transwell assay assessment of the migration and invasion of U87, U87-PGCCs, U251 and U251-PGCCs. (B, C) Quantitative analysis of cell migration and invasion of the indicated groups. Data represent the mean ± SD, * P < 0.05.

**Supplementary Figure 3. PGCCs demonstrated heightened resistance to TMZ, Irinotecan, Carmustine, and Cisplatin.** (A) Trypan blue assessment of cell viability of U87, U87-PGCCs, U251 and U251-PGCCs cells under drug-free conditions. (B) Cell viability of the cells after treatment with TMZ for 24h at the indicated concentrations detected by CCK8. (C) Cell viability of the cells after treatment with Irinotecan for 24h at the indicated concentrations detected by CCK8. (D) Cell viability of the cells after treatment with Carmustine for 24h at the indicated concentrations detected by CCK8. (E) Cell viability of the cells after treatment with Cisplatin for 24h at the indicated concentrations detected by CCK8. Data represent the mean ± SD, ns: no significance, *** P < 0.001, **** P < 0.0001.

**Supplementary Figure 4. PGCC-derived xenograft tumors exhibited markedly enhanced aggressiveness.** (A) Kaplan-Meier survival curves of nude mice harboring U87 and U87-PGCCs (n=5). (B) H&E staining and immunohistochemical analysis of Ki-67 and SOX2 in U87 and U87-PGCC xenografts. (C) Quantification of Ki-67 and SOX2 IHC scores in the indicated groups. Data represent the mean ± SD, *** P < 0.001, **** P < 0.0001.

**Supplementary Figure 5. Heatmap and GSEA of RNA-seq data of control U87 glioma cells and PGCCs.** (A) Heatmap showing clustered RNA expression profiles of U87 parental cells and U87-PGCCs (n=5). (B) GSEA of G2M, p53 and apoptosis pathways in PGCCs versus parental cells. (C) Normalized Cut&tag tracks of BRD4 and H3K27Ac at Myc gene loci.

**Supplementary Figure 6. TMZ treatment enhances the expression of BRD4 and H3K27Ac in glioma tumors.** (A) Immunohistochemical analysis of BRD4 and H3K27Ac in xenograft tumors with or without TMZ exposure. Arrow indicates representative staining patterns of BRD4 and H3K27Ac in PGCCs. (B) Quantification of BRD4 and H3K27Ac IHC scores in the indicated groups. Data represent the mean ± SD, ** P < 0.01, *** P < 0.001.

**Supplementary Figure 7. TIE1 expression was markedly elevated in cisplatin-induced PGCCs.** (A) PI flow cytometry quantification of polyploidy in U87 and U251 cells between control and cisplatin-induced PGCCs. (B) RT-qPCR assessment of TIE1 mRNA levels in PGCCs versus parental glioma cells (control). (C) Western blot analysis of TIE1 protein expression in parental glioma cells (control) and PGCCs. Data represent the mean ± SD, *** P < 0.001, **** P < 0.0001.

**Supplementary Figure 8. Depletion of TIE1 diminishes PGCC-associated tumorsphere formation, invasiveness and chemoresistance.** (A) Representative light micrographs of tumorsphere formation of U87-PGCCs and U251-PGCCs stably expressing shNTC or shTIE1 with or without exposure to PI3K/AKT inhibitor MK2206. scale bar=100μm. (B) Quantitative analysis of relative sphere numbers and relative sphere diameters of U87-PGCCs of the indicated groups. (C) Quantitative analysis of relative sphere numbers and relative sphere diameters of U251-PGCCs of the indicated groups. (D) Transwell assay assessment of the invasion of U87-PGCCs and U251-PGCCs expressing shNTC or shTIE1 with or without exposure to MK2206. scale bar=200μm. (E, F) Quantitative analysis of cell invasion in the indicated groups. (G) CCK-8 assay evaluating the effect of MK2206 on TMZ of U87-PGCCs and U251-PGCCs expressing shNTC or shTIE1. (H) CCK-8 assay of the effect of MK2206 on carmustine sensitivity in U87-PGCCs and U251-PGCCs expressing shNTC or shTIE1. Data represent the mean ± SD, ns: no significance, * P < 0.05, ** P < 0.01.
