# Supplementary material
Source: Research Square preprint supplement (doi:10.21203/rs.3.rs-9526893/v1)
Supplement: Supplementary file 3 [file a7a0e3014ea87e77eb683610.docx]

**Supplementary Table S1. Primer sequences for Real-Time qPCR.**

| Gene | Forward (5' to 3') | Reverse (5' to 3') |
| --- | --- | --- |
| *CCL3* | TGCCCTTGCTGTCCTCCTCTG | AGGCGGTCGGCGTGTCAG |
| *LCE1F* | CCTCCTGCGGTGCTGAAGAAC | CTGGCTCTGCTGGCAAGACATC |
| *SPRR2D* | CACCGATCTGCTTTGGAGAACCTG | GACATGGCTCTGGGCACTTTGG |
| *SERPINA9* | GCCTCTGTGCTCCAATCTACTGTG | CGGTATAGGCGGAAGGCAAAGTC |
| *MMP10* | CGCCCAGTTCCGCCTTTCG | GGATCACACTTGGCTGGCATCTC |
| *PARM1* | TTTCTACAACCTGCCAACCCACAC | GGCTTGCTCATTCTCCGTCCAC |
| *TIE1* | TGGTGGGCTCCGTGTCTGC | TGGTAGGTGAAGGTGCGTCTCC |
| *ABLIM1* | GCTGCGGCTAAGAAGGAAGAGTG | GGCACGGCTGAGTAACACGAAG |
| *RGS16* | GCTTCCTGAAGTCGCCTGCTTAC | TTCCTCACTGCCGTGGAGACTC |
| *TMEM151B* | CCACCTATGCAACATCGCCTCTG | CCTCCTCACTCAGCCATCTCTACC |
| *GAPDH* | AGAAGGCTGGGGCTCATTTG | GCAGGAGGCATTGCTGATGAT |
