# Supplementary material
Source: Research Square preprint supplement (doi:10.21203/rs.3.rs-9526893/v1)

Figure 3

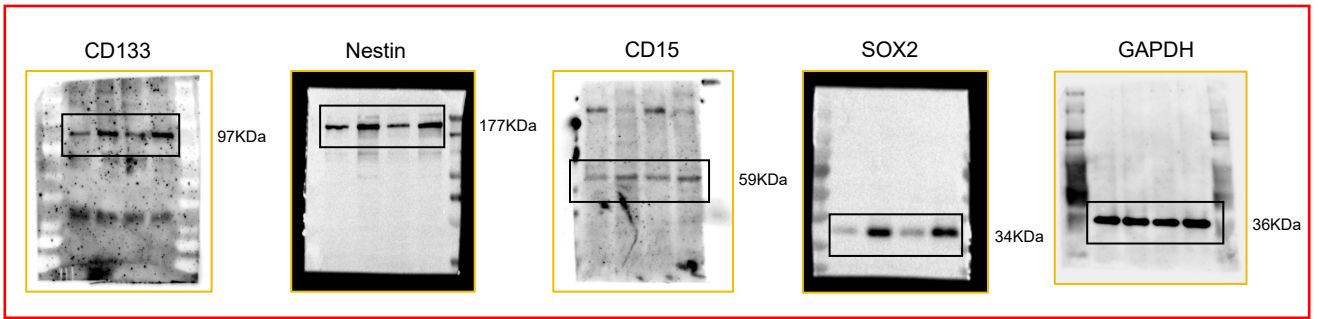

Figure 6

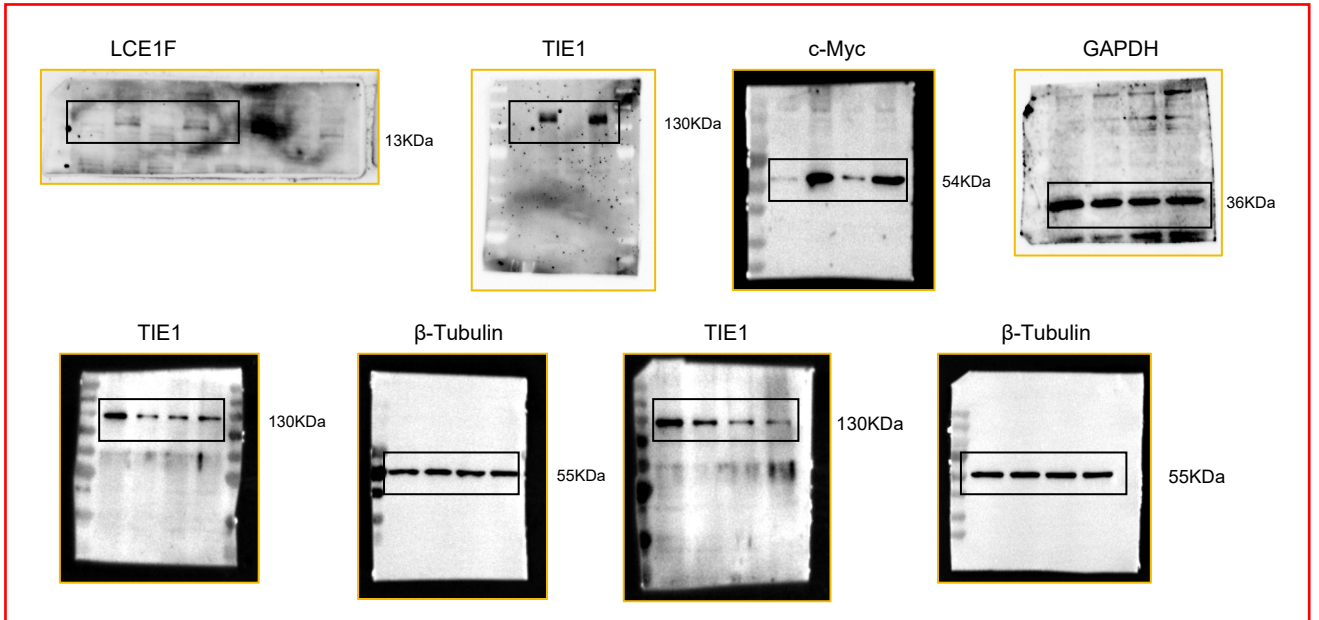

Figure 7

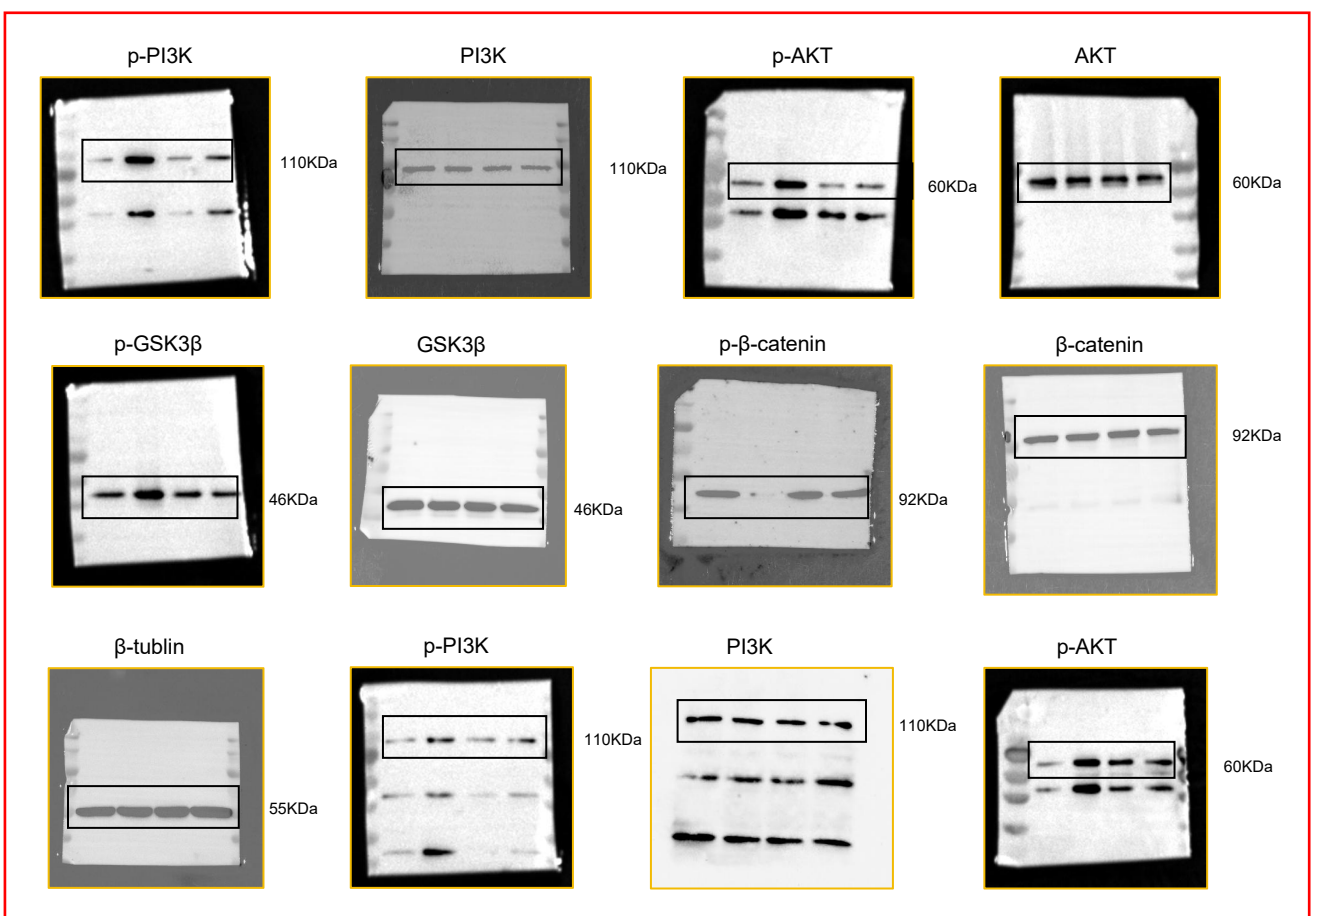

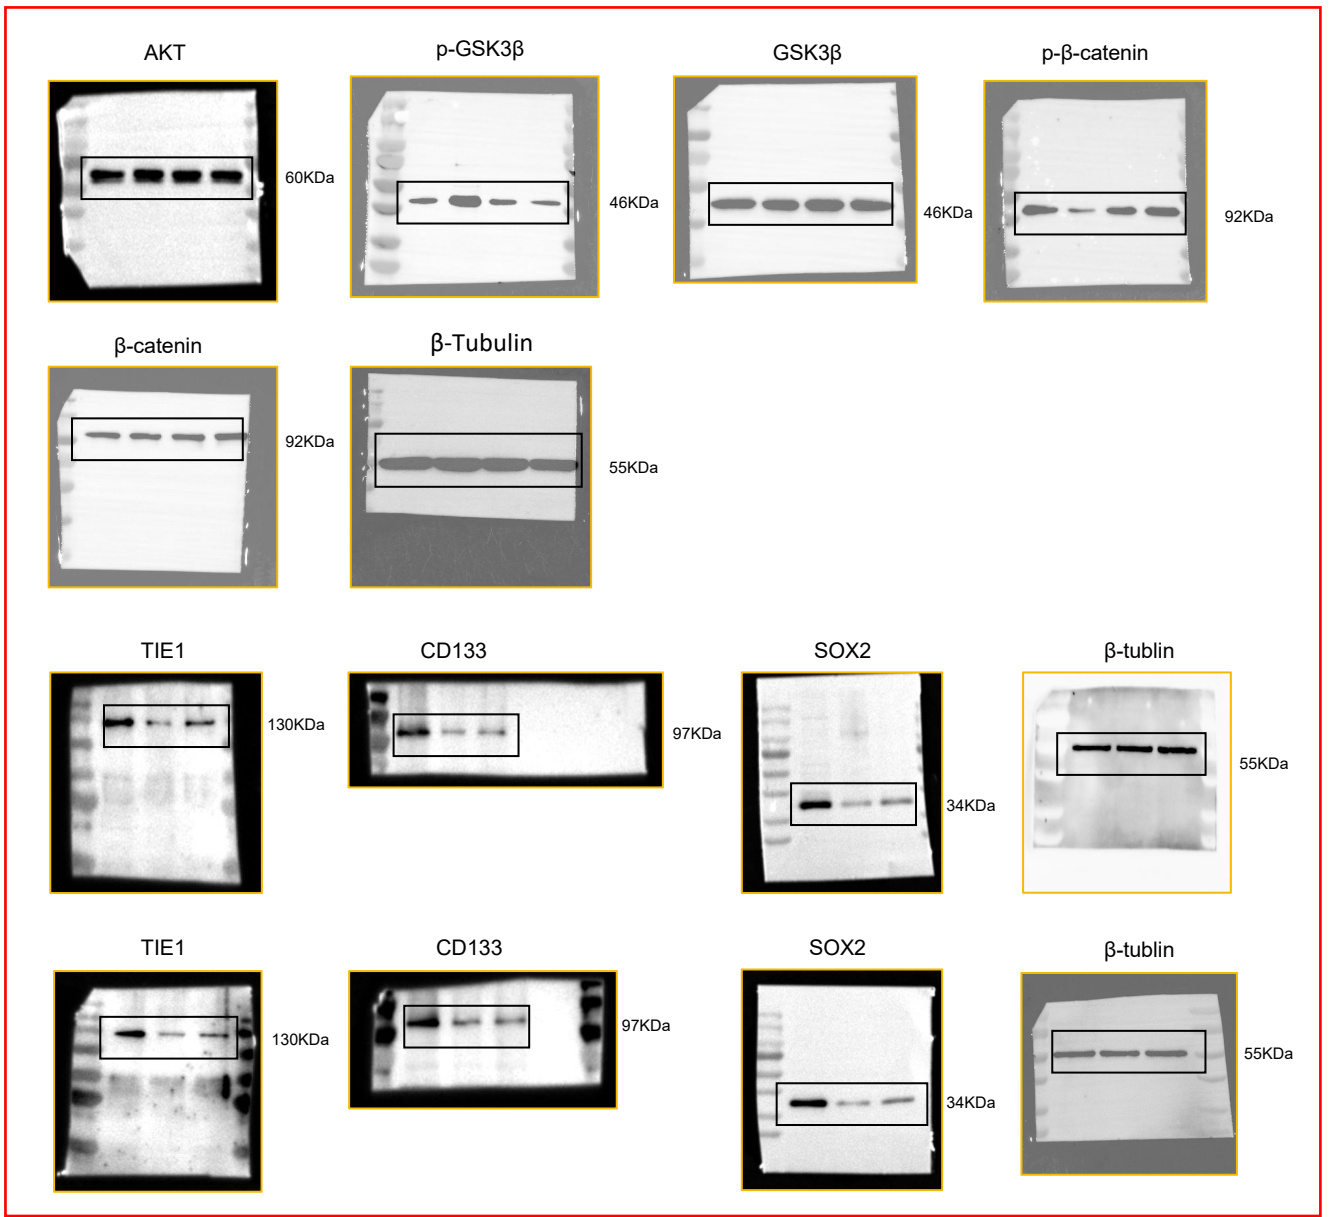

Supplementary Figure 7

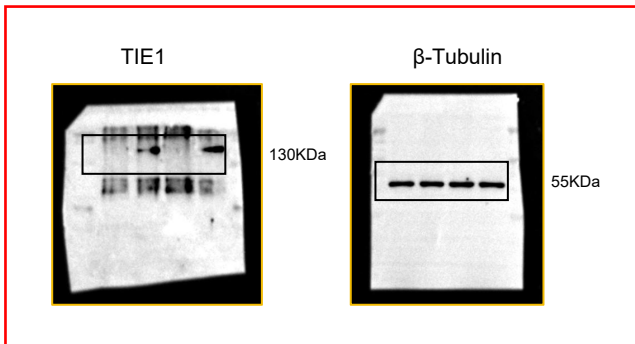

Supplement: Supplementary file 4 [file d3c403cf43b35b39d615fdfe.pdf]
